# Supplementary material for: Control systems for membrane fusion in the ancestral eukaryote; evolution of tethering complexes and SM proteins
Source: PubMed Central journal article supplement (PMC1810245; doi:10.1186/1471-2148-7-29), 2007-02-23

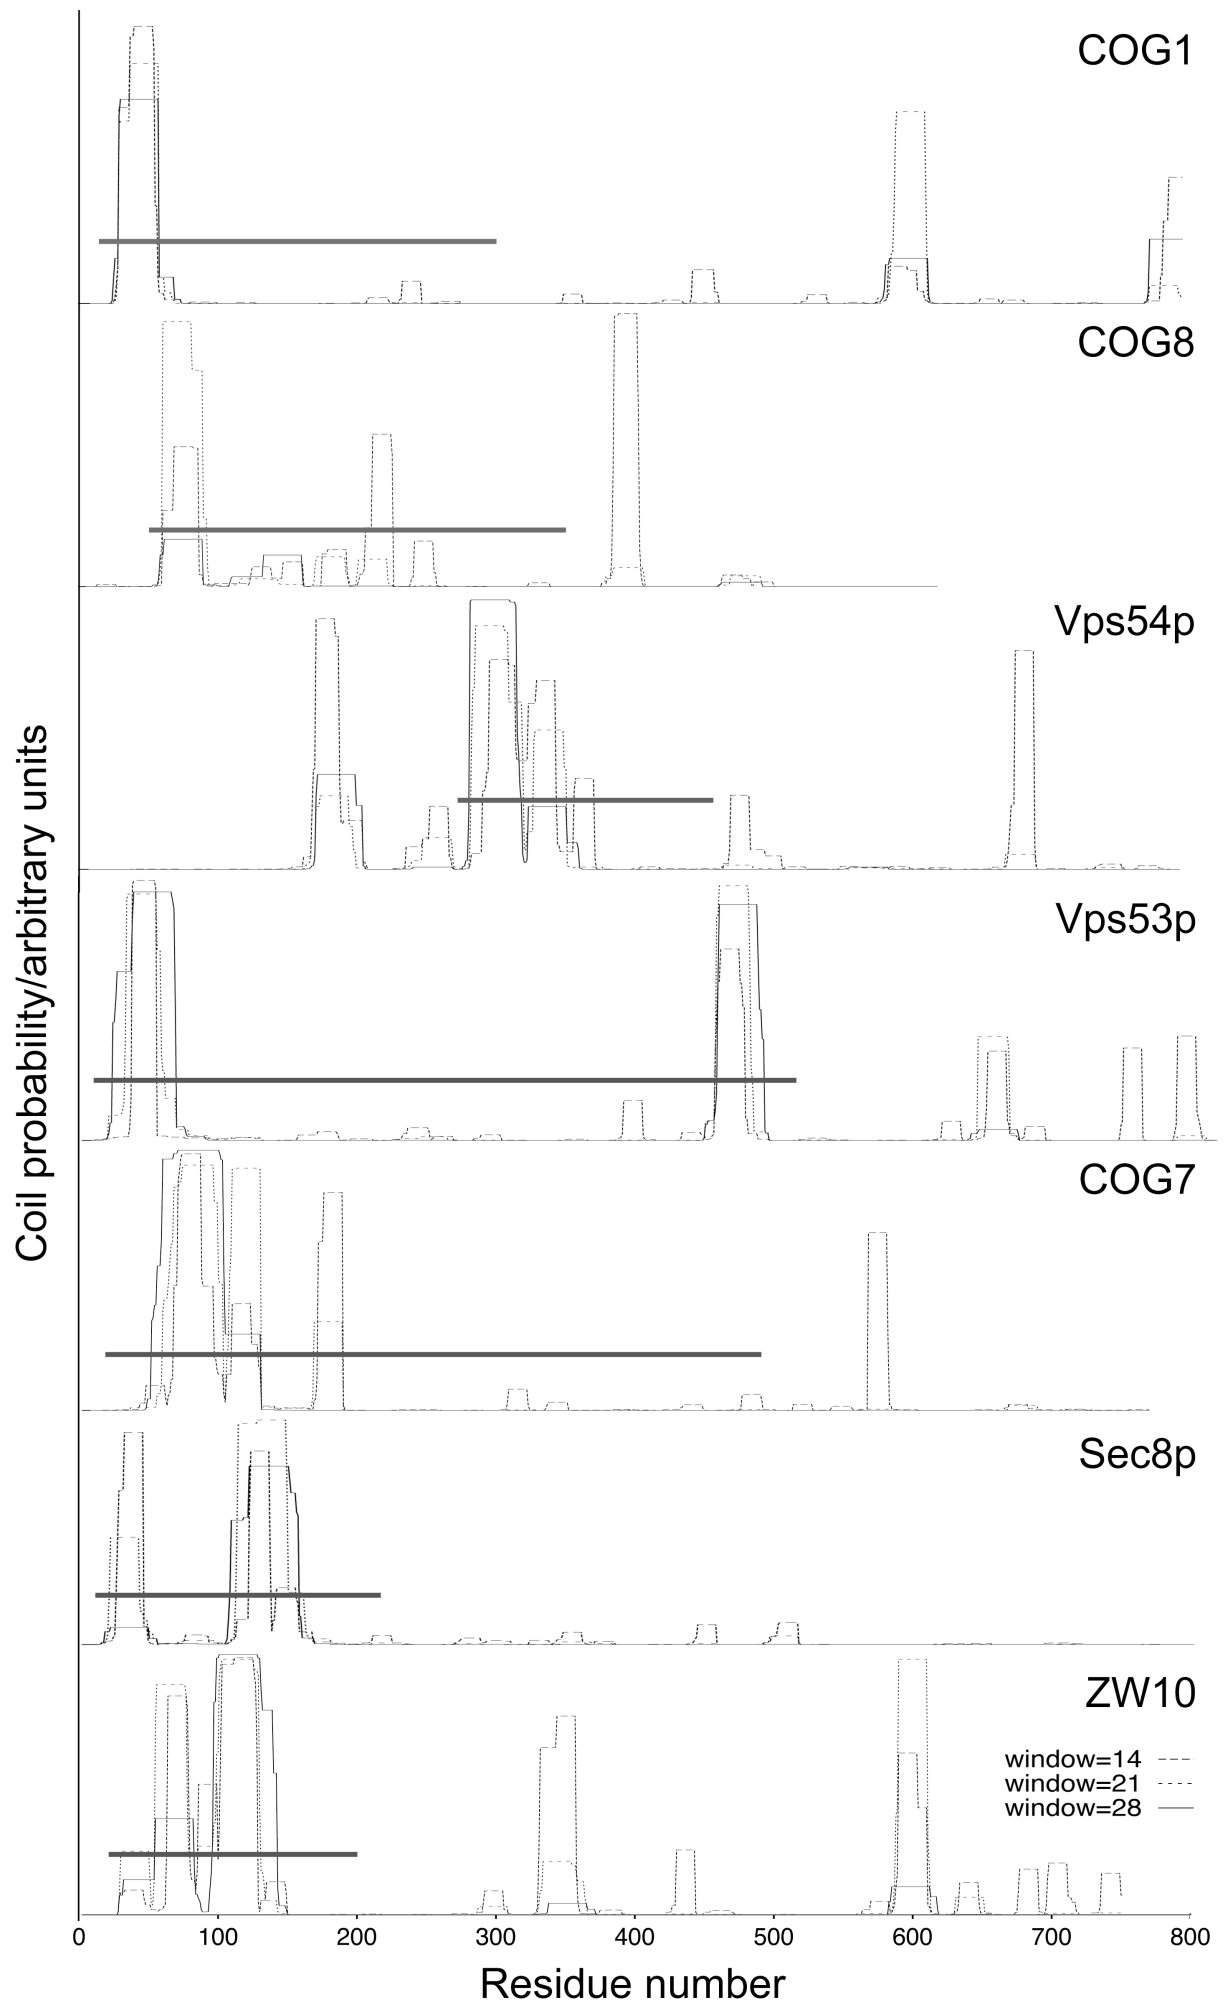

Supplement: 1471-2148-7-29-S1.pdf [file 1471-2148-7-29-S1.pdf]
