# Supplementary material for: Control systems for membrane fusion in the ancestral eukaryote; evolution of tethering complexes and SM proteins
Source: PubMed Central journal article supplement (PMC1810245; doi:10.1186/1471-2148-7-29), 2007-02-23
Supplement: 1471-2148-7-29-S2.pdf [file 1471-2148-7-29-S2.pdf]

|                                |                                                   |    |
|--------------------------------|---------------------------------------------------|----|
| H.sapiens Q9Y5R8 TPPC1_HUMAN   | -----MTVHNLYLFDNRNGVCLHYSEWHRKKQ----              | 26 |
| A.thaliana NP_175528.1 unknown | MQFFGGSEISPPVPTASGNNAMMYVFNRRNGVCLLYKEWNRPLH----  | 46 |
| C.elegans NP_001023758.1       | -----MTIYNVYIFDREGQCLYYDEWFRTKQ----               | 26 |
| C.elegans NP_001023759.1       | -----MTIYNVYIFDREGQCLYYDEWFRTKQ----               | 26 |
| S.cerevisiae NP_013634.1 Bet5p | -----MGIYSFWIFDRHCNCFDREWTLASNSASG                | 30 |
| P.falciparum PF14_0049  hypot  | ----MILSNEKIPQVTDKWGDMYYFYIFYKN-QCIYSIDLKNNNTQEKK | 45 |

: ::\* :. \* : :

|                                |                                                  |    |
|--------------------------------|--------------------------------------------------|----|
| H.sapiens Q9Y5R8 TPPC1_HUMAN   | --AGIPKEEEYKLMYGMLFSIRSFVSKMSPL-----             | 55 |
| A.thaliana NP_175528.1 unknown | --TLNP-QQDHKLMFGLLFSLKSLTAKMDPV-----             | 74 |
| C.elegans NP_001023758.1       | --SGLAPIQEYKLVFGMMLSMKSFVDRLATN-----             | 55 |
| C.elegans NP_001023759.1       | --SGLAPIQEYKLVFGMMLSMKSFVDRLATN-----             | 55 |
| S.cerevisiae NP_013634.1 Bet5p | TINSKQNEEDAKLLYGMIFSLRSITQKLSKG-----             | 61 |
| P.falciparum PF14_0049  hypot  | --KSNKNETEKLLLSIYAINYLCSNIQPNKKLKNLYKSISNSNPKLIN | 93 |

: \*\*: \* : :. : .:

|                                |                                                     |     |
|--------------------------------|-----------------------------------------------------|-----|
| H.sapiens Q9Y5R8 TPPC1_HUMAN   | -DMKDG-----FLAFQTSRYKLHYYETPTGIKVVMTDLGVG           | 91  |
| A.thaliana NP_175528.1 unknown | -NADKGNLGVPLPGQGSFHSFRNTYKLSFMETPSGIKIILVTHPKTG     | 123 |
| C.elegans NP_001023758.1       | -DSNQT-----VNYYKTSAYKMTFLESATSIKIMLNTDPNAT          | 91  |
| C.elegans NP_001023759.1       | -DSNQT-----VNYYKTSAYKMTFLESATSIKIMLNTDPNAT          | 91  |
| S.cerevisiae NP_013634.1 Bet5p | -SVKND-----IRSISTGKYRVHTYCTASGLWFVLLSDFKQQ          | 97  |
| P.falciparum PF14_0049  hypot  | TNIQTQNNINTQENIHVGNFNCFNTPFYKLVHVVETLTAYKFLVLIHKNIP | 143 |

. . . \* \*:: : :. :. :.

|                                |                                                   |     |
|--------------------------------|---------------------------------------------------|-----|
| H.sapiens Q9Y5R8 TPPC1_HUMAN   | PIRDVLHHIYSALYVELVVKNPCLPLGQTVQSELFRS-----        | 128 |
| A.thaliana NP_175528.1 unknown | DLRESLKYIYS-LYVEYVVKNPISPGSPIKSELFNT-----         | 159 |
| C.elegans NP_001023758.1       | GIRDLLHKIYQWTWETANSAKLELFASNPPNENFLKNHKKMSEPSAPPD | 141 |
| C.elegans NP_001023759.1       | GIRDLLHKIYQWTWETANSAKLELFASNPPNENFLKNHKKMSEPSAPPD | 141 |
| S.cerevisiae NP_013634.1 Bet5p | SYTQVLQYIYSHIYVKYVSNLLSPYDFAENENEMRG-----Q        | 135 |
| P.falciparum PF14_0049  hypot  | NLSNFLKDIYKTIFIDLIILNPVYKIGDEIKDKMFDE-----        | 180 |

: \*: \*\*. : :. :

|                                |                                                    |     |
|--------------------------------|----------------------------------------------------|-----|
| H.sapiens Q9Y5R8 TPPC1_HUMAN   | RLDSYVRS--LPPFSARAG-----                           | 145 |
| A.thaliana NP_175528.1 unknown | ALDQYVRS--IS-----                                  | 169 |
| C.elegans NP_001023758.1       | EAESTIRSPDLPFVSSIVGGLFAGRAIVVSGMVLPGFASDRKRFQIDLCC | 191 |
| C.elegans NP_001023759.1       | EAESTIRSPDLPFVSSIVGGLFAGRAIVVSGMVLPGFASDRKRFQIDLCC | 191 |
| S.cerevisiae NP_013634.1 Bet5p | GTRKITNRNFIISVLESFLAPMVNQ-----                     | 159 |
| P.falciparum PF14_0049  hypot  | KILEKIKRRLYVG-----                                 | 192 |

. . :

|                                |                                                    |     |
|--------------------------------|----------------------------------------------------|-----|
| H.sapiens Q9Y5R8 TPPC1_HUMAN   | -----                                              |     |
| A.thaliana NP_175528.1 unknown | -----                                              |     |
| C.elegans NP_001023758.1       | GLLIDGDHMDNKALHFNPRFDAQTGWFSGPGDDKLVINSFVSGRWGNEER | 241 |
| C.elegans NP_001023759.1       | GLLIDGDHMDNKALHFNPRFDAQTGWFSGPGDDKLVINSFVSGRWGNEER | 241 |
| S.cerevisiae NP_013634.1 Bet5p | -----                                              |     |
| P.falciparum PF14_0049  hypot  | -----                                              |     |

|                                |                                                    |     |
|--------------------------------|----------------------------------------------------|-----|
| H.sapiens Q9Y5R8 TPPC1_HUMAN   | -----                                              |     |
| A.thaliana NP_175528.1 unknown | -----                                              |     |
| C.elegans NP_001023758.1       | FDNPFKEGEPFQIRIMVFEKYFKISASGKHMCDPFRVVPVESIRTISING | 291 |
| C.elegans NP_001023759.1       | FDNPFKEGEPFQIRIMVFEKYFKISASGKHMCDPFRVVPVESIRTISING | 291 |
| S.cerevisiae NP_013634.1 Bet5p | -----                                              |     |
| P.falciparum PF14_0049  hypot  | -----                                              |     |

|                                |                                                    |     |
|--------------------------------|----------------------------------------------------|-----|
| H.sapiens Q9Y5R8 TPPC1_HUMAN   | -----                                              |     |
| A.thaliana NP_175528.1 unknown | -----                                              |     |
| C.elegans NP_001023758.1       | NIRVDYVEFHPPPE----DSMPTE-----                      | 310 |
| C.elegans NP_001023759.1       | NIRVDYVEFHPPIGIGADGKPTLVAPTPKQEVITKIDKPNVPFELPLPPG | 341 |
| S.cerevisiae NP_013634.1 Bet5p | -----                                              |     |

---

---

```
P.falciparum|PF14_0049||hypot -----  
  
H.sapiens|Q9Y5R8|TPPC1_HUMAN -----  
A.thaliana|NP_175528.1|unknown -----  
C.elegans|NP_001023758.1| -----  
C.elegans|NP_001023759.1| GFVSPQSARFTITPFLSSERFTINLKSKEFLFHFRVDMPNQAQKIKPHV 391  
S.cerevisiae|NP_013634.1|Bet5p -----  
P.falciparum|PF14_0049||hypot -----  
  
H.sapiens|Q9Y5R8|TPPC1_HUMAN -----  
A.thaliana|NP_175528.1|unknown -----  
C.elegans|NP_001023758.1| -----  
C.elegans|NP_001023759.1| IRNSSKNGVKWLTEERTFGTFPFHKGITHDIVFTAYGKSVTVDVDGAPFV 441  
S.cerevisiae|NP_013634.1|Bet5p -----  
P.falciparum|PF14_0049||hypot -----  
  
H.sapiens|Q9Y5R8|TPPC1_HUMAN -----  
A.thaliana|NP_175528.1|unknown -----  
C.elegans|NP_001023758.1| -----  
C.elegans|NP_001023759.1| KFYVRDGDGDPVNVDQITVVGDVLIHRFEHKG 472  
S.cerevisiae|NP_013634.1|Bet5p -----  
P.falciparum|PF14_0049||hypot -----
```
