# Supplementary material for: Control systems for membrane fusion in the ancestral eukaryote; evolution of tethering complexes and SM proteins
Source: PubMed Central journal article supplement (PMC1810245; doi:10.1186/1471-2148-7-29), 2007-02-23
Supplement: 1471-2148-7-29-S3.pdf [file 1471-2148-7-29-S3.pdf]

Tethers Master

| COMPLEX       | FACTOR<br>Name, synonym1, synonym2, etc | Opisthokonta         |                      |                   | Amoebozoa         |                      | Plantae            | Rhodophyta                         |                   |                      | Chromalveolata   |                       | Stramenopiles     |                      |                  | Excavata        |                 |   | Diplomonads            |
|---------------|-----------------------------------------|----------------------|----------------------|-------------------|-------------------|----------------------|--------------------|------------------------------------|-------------------|----------------------|------------------|-----------------------|-------------------|----------------------|------------------|-----------------|-----------------|---|------------------------|
|               |                                         | Fungi                | Metazoa              |                   |                   |                      |                    |                                    |                   |                      |                  |                       |                   |                      |                  |                 |                 |   | <i>G. intestinalis</i> |
|               |                                         | <i>S. cerevisiae</i> | <i>C. neoformans</i> | <i>H. sapiens</i> | <i>C. elegans</i> | <i>D. discoïdium</i> | <i>A. thaliana</i> | <i>C. reinhardtii</i> <sup>1</sup> | <i>C. merolae</i> | <i>P. falciparum</i> | <i>T. aondii</i> | <i>T. thermophila</i> | <i>P. ramorum</i> | <i>T. pseudonana</i> | <i>T. brucei</i> | <i>T. cruzi</i> | <i>L. major</i> |   |                        |
| HOPS          | Vps11, Pep5, End1                       | Y                    | Y                    | Y                 | Y                 | Y                    | Y                  | Y                                  | N                 | Y                    | Y                | Y                     | Y                 | Y                    | Y                | Y               | Y               | Y |                        |
|               | Vps16                                   | Y                    | Y                    | Y                 | Y                 | Y                    | Y                  | Y                                  | N                 | Y                    | Y                | Y                     | Y                 | Y                    | Y                | Y               | Y               | N |                        |
|               | Vps18, Pep3                             | Y                    | Y                    | Y                 | Y                 | Y                    | Y                  | N                                  | Y                 | Y                    | Y                | Y                     | N                 | Y                    | Y                | Y               | Y               | N |                        |
|               | Vps33, Slip1, Vam5                      | Y                    | Y                    | Y                 | Y                 | Y                    | Y                  | Y                                  | Y                 | Y                    | Y                | Y                     | Y                 | Y                    | Y                | Y               | Y               | Y |                        |
|               | Vps39, Vam6                             | Y                    | N                    | Y                 | Y                 | Y                    | Y                  | N                                  | N                 | N                    | N                | N                     | N                 | N                    | Y                | Y               | Y               | N |                        |
|               | Vps41, Vam2                             | Y                    | Y                    | Y                 | Y                 | Y                    | Y                  | Y                                  | N                 | N                    | N                | N                     | Y                 | Y                    | Y                | Y               | Y               | Y |                        |
| COG           | COG1, LDLB, Sec36                       | Y                    | N                    | Y                 | Y                 | Y                    | Y                  | N                                  | N                 | N                    | N                | Y                     | N                 | Y                    | Y                | Y               | N               |   |                        |
|               | COG2, LDLC, Sec35                       | Y                    | N                    | Y                 | Y                 | Y                    | Y                  | Y                                  | Y                 | N                    | N                | Y                     | Y                 | Y                    | Y                | Y               | N               |   |                        |
|               | COG3, Sec34, Grd20                      | Y                    | Y                    | Y                 | Y                 | Y                    | Y                  | Y                                  | Y                 | N                    | Y                | Y                     | Y                 | Y                    | Y                | Y               | N               |   |                        |
|               | COG4, Sec38                             | Y                    | Y                    | Y                 | Y                 | Y                    | Y                  | Y                                  | Y                 | N                    | Y                | Y                     | Y                 | N                    | Y                | Y               | Y               |   |                        |
|               | COG5, Tfi3, GTC-90 <sup>2</sup>         | Y                    | Y                    | Y                 | N                 | Y                    | Y                  | Y                                  | N                 | N                    | N                | N                     | Y                 | Y                    | Y                | Y               | Y               |   |                        |
|               | COG6, hCod2                             | Y                    | N                    | Y                 | Y                 | Y                    | Y                  | Y                                  | N                 | N                    | N                | N                     | Y                 | Y                    | Y                | Y               | Y               |   |                        |
|               | COG7, hCod5, Sec37 <sup>2</sup>         | Y                    | N                    | Y                 | N                 | Y                    | Y                  | Y                                  | N                 | N                    | N                | N                     | Y                 | N                    | Y                | Y               | Y               |   |                        |
|               | COG8, Dor1, Cod5                        | Y                    | N                    | Y                 | Y                 | Y                    | Y                  | Y                                  | Y                 | N                    | N                | N                     | Y                 | Y                    | Y                | Y               | Y               |   |                        |
| GARP          | Vps51, API3, WHI6, Vps67 <sup>3</sup>   | Y                    | N                    | Y                 | N                 | N                    | N                  | N                                  | N                 | N                    | N                | N                     | N                 | N                    | N                | N               | N               |   |                        |
|               | Vps52, Sac2, ARE1, SACM2L               | Y                    | Y                    | Y                 | Y                 | Y                    | Y                  | Y                                  | N                 | Y                    | Y                | N                     | Y                 | Y                    | Y                | Y               | N               |   |                        |
|               | Vps53                                   | Y                    | Y                    | Y                 | Y                 | Y                    | Y                  | N                                  | Y                 | Y                    | Y                | N                     | Y                 | Y                    | Y                | Y               | N               |   |                        |
|               | Vps54                                   | Y                    | Y                    | Y                 | N                 | N                    | Y                  | N                                  | N                 | N                    | N                | N                     | N                 | N                    | Y                | Y               | Y               |   |                        |
| Exocyst       | Sec3, EXOC1                             | Y                    | Y                    | Y                 | Y                 | Y                    | Y                  | N                                  | N                 | N                    | N                | N                     | Y                 | Y                    | Y                | Y               | N               |   |                        |
|               | Sec5, EXOC2                             | Y                    | Y                    | Y                 | Y                 | Y                    | Y                  | Y                                  | N                 | Y <sup>4</sup>       | N                | N                     | Y                 | N                    | N                | N               | N               |   |                        |
|               | Sec6, EXOC3                             | Y                    | Y                    | Y                 | Y                 | Y                    | Y                  | Y                                  | Y <sup>5</sup>    | N                    | N                | Y                     | N                 | N                    | Y                | Y               | N               |   |                        |
|               | Sec8, EXOC4                             | Y                    | Y                    | Y                 | Y                 | Y                    | Y                  | Y                                  | N                 | N                    | Y                | N                     | Y                 | N                    | Y                | Y               | N               |   |                        |
|               | Sec10, EXOC5                            | Y                    | Y                    | Y                 | Y                 | Y                    | Y                  | N                                  | N                 | N                    | N                | Y                     | N                 | Y                    | Y                | Y               | N               |   |                        |
|               | Sec15, EXOC6                            | Y                    | Y                    | Y                 | Y                 | Y                    | Y                  | N                                  | N                 | N                    | N                | Y                     | N                 | Y                    | Y                | Y               | N               |   |                        |
|               | Exo70, EXOC7                            | Y                    | Y                    | Y                 | Y                 | Y                    | Y                  | Y                                  | N                 | N                    | N                | N                     | Y                 | Y                    | Y                | Y               | N               |   |                        |
|               | Exo84, EXOC8                            | Y                    | Y                    | Y                 | Y                 | Y                    | Y                  | Y                                  | N                 | N                    | N                | N                     | N                 | N                    | N                | N               | N               |   |                        |
| Dsl1          | Dsl1, ZW10                              | Y                    | N                    | Y                 | Y                 | Y                    | Y                  | N                                  | N                 | N                    | N                | Y                     | Y                 | N                    | N                | N               | N               |   |                        |
|               | Dsl3, Sec39                             | Y                    | N                    | N                 | N                 | N                    | N                  | N                                  | N                 | N                    | N                | N                     | N                 | N                    | N                | N               | N               |   |                        |
|               | Tip20, RINT1                            | Y                    | Y                    | Y                 | N                 | Y                    | Y                  | Y                                  | N                 | N                    | N                | Y                     | N                 | N                    | N                | N               | N               |   |                        |
|               | Sec20, BNIP1                            | Y                    | Y                    | Y                 | N                 | Y                    | Y                  | Y                                  | N                 | Y                    | N                | N                     | Y                 | Y <sup>6</sup>       | Y <sup>6</sup>   | Y <sup>6</sup>  | Y               |   |                        |
| TRAPPI        | Trs20, TRAPPC2, SEDL                    | Y                    | Y                    | Y                 | Y                 | Y                    | Y                  | Y                                  | Y                 | Y                    | Y                | Y                     | Y                 | Y                    | Y                | N               | N               |   |                        |
|               | Trs23, TRAPPC4, synbindin               | Y                    | Y                    | Y                 | Y                 | Y                    | Y                  | Y                                  | Y                 | Y                    | Y                | Y                     | Y                 | Y                    | Y                | Y               | Y               |   |                        |
|               | Trs31, TRAPPC5                          | Y                    | Y                    | Y                 | Y                 | Y                    | Y                  | Y                                  | Y                 | Y                    | Y                | Y                     | Y                 | Y                    | Y                | Y               | Y               |   |                        |
|               | Trs33, TRAPPC6A                         | Y                    | Y                    | Y                 | Y                 | Y                    | Y                  | Y                                  | Y                 | Y                    | Y                | Y                     | Y                 | Y                    | Y                | Y               | N               |   |                        |
|               | Trs85, Gsa1, Mum1, TRAPPC8 <sup>8</sup> | Y                    | Y                    | Y                 | Y                 | Y                    | Y                  | Y                                  | Y                 | Y                    | Y                | Y                     | Y                 | Y                    | Y                | Y               | Y               |   |                        |
|               | Bet3, TRAPPC3                           | Y                    | Y                    | Y                 | Y                 | Y                    | Y                  | Y                                  | Y                 | Y                    | Y                | Y                     | Y                 | Y                    | Y                | Y               | Y               |   |                        |
| Bet5, TRAPPC1 | Y                                       | Y                    | Y                    | Y                 | Y                 | Y                    | Y                  | Y                                  | Y                 | Y                    | Y                | Y                     | Y                 | Y                    | Y                | Y               |                 |   |                        |
| TRAPPII       | Trs65, Kre11, TRAPPC7                   | Y                    | N                    | N                 | N                 | N                    | N                  | N                                  | N                 | N                    | N                | N                     | N                 | N                    | N                | N               | N               |   |                        |
|               | Trs120, TRAPPC9                         | Y                    | N                    | Y                 | Y                 | Y                    | Y                  | Y                                  | N                 | N                    | N                | Y                     | Y                 | N                    | N                | N               | N               |   |                        |
|               | Trs130, TRAPPC10                        | Y                    | Y                    | Y                 | Y                 | Y                    | Y                  | N                                  | N                 | N                    | N                | Y                     | Y                 | N                    | N                | N               | N               |   |                        |
